# Supplementary material for: Optimization effect of Ag-regulated manganese oxides on electrocatalytic performance for Li–O2 batteries
Source: Royal Society of Chemistry journal article supplement (doi:10.1039/d3cy00830d), 2023-01-01
Supplement: d3cy00830d1.pdf [file d3cy00830d1.pdf]

## Optimization effect of Ag-regulated manganese oxides on electrocatalytic performance for Li-O<sub>2</sub> batteries

Qiang Huang,<sup>a</sup> Linna Dai,<sup>\*a</sup> Shengnan Zhang,<sup>b</sup> Pei Hu<sup>a</sup> and Lijie Ci<sup>\*b</sup>

<sup>a</sup> School of Science, Hubei University of Technology, Nanli Road #28, Wuhan, Hubei Province, 430068, China

<sup>b</sup> Research Center for Carbon Nanomaterials, Key Laboratory for Liquid-Solid Structural Evolution and Processing of Materials (Ministry of Education), School of Materials Science and Engineering, Shandong University, Jinan 250061, China

\* Corresponding authors

E-mail addresses: 20220061@hbut.edu.cn, lci@sdu.edu.cn

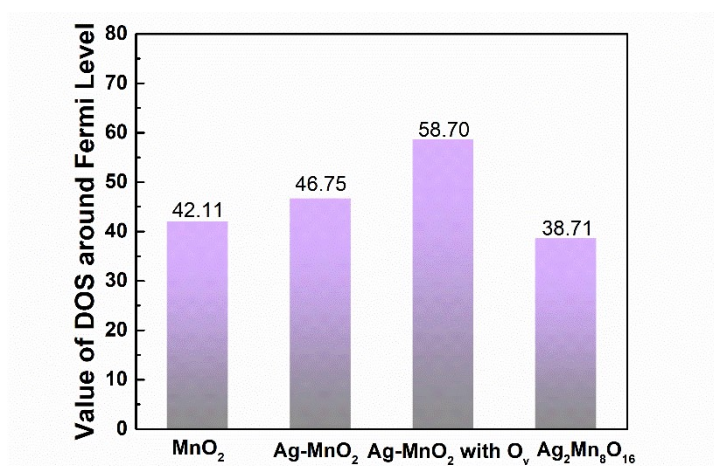

Figure S1. The values of DOS around Fermi level.

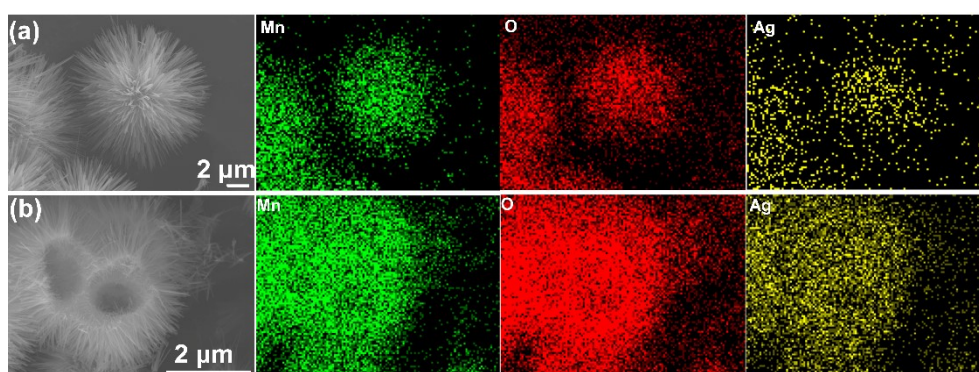

Figure S2. SEM image and corresponding EDS elemental mapping results of (a) Ag-MnO<sub>2</sub>, (b) Ag<sub>2</sub>Mn<sub>8</sub>O<sub>16</sub>.

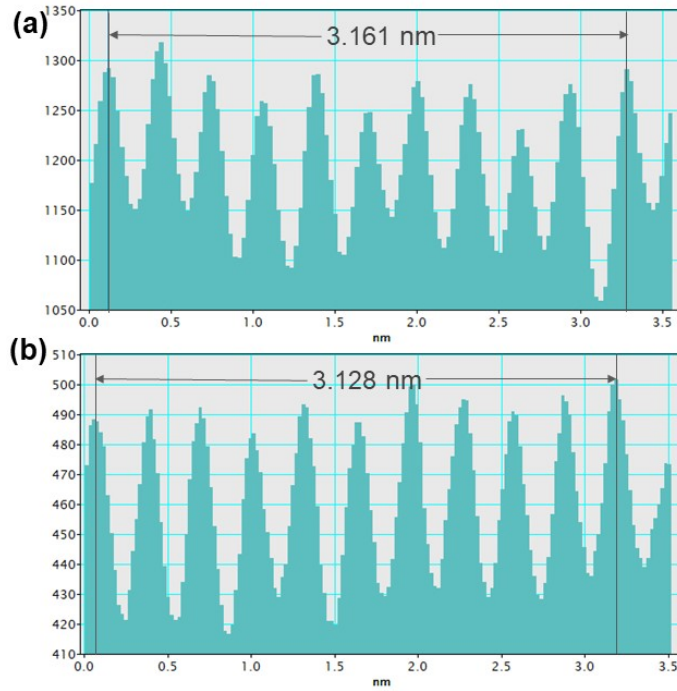

**Figure S3.** Profile of lattice fringes of (a) Ag-MnO<sub>2</sub> and (b) Ag<sub>2</sub>Mn<sub>8</sub>O<sub>16</sub>.

**Table S1.** The adsorption energies ( $\Delta E_{\text{ads}}$ ) of LiO<sub>2</sub> and corresponding bonding parameters of (100) lattice plane.

| Crystal                                                 | $d_{\text{Li-O}}$ (Å) | $d_{\text{Mn-O}}$ (Å) | $\Delta E_{\text{ads}}$ (eV) |
|---------------------------------------------------------|-----------------------|-----------------------|------------------------------|
| $\alpha$ -MnO <sub>2</sub>                              | 1.938                 | 1.947                 | -3.50                        |
| Ag-doped $\alpha$ -MnO <sub>2</sub>                     | 1.869                 | 1.960                 | -2.30                        |
| Ag-doped $\alpha$ -MnO <sub>2</sub> with oxygen vacancy | 1.851                 | 1.948                 | -2.82                        |

**Table S2.** Calculated cell parameters for MnO<sub>2</sub>, Ag-MnO<sub>2</sub> and Ag<sub>2</sub>Mn<sub>8</sub>O<sub>16</sub>.

| Chemical composition                          | MnO <sub>2</sub> n | Ag-MnO <sub>2</sub> | Ag <sub>2</sub> Mn <sub>8</sub> O <sub>16</sub> |
|-----------------------------------------------|--------------------|---------------------|-------------------------------------------------|
| Unit cell $a$ (Å)                             | 9.878              | 9.806               | 9.780                                           |
| Unit cell $b$ (Å)                             | 9.878              | 9.806               | 9.780                                           |
| Unit cell $c$ (Å)                             | 2.859              | 2.848               | 2.861                                           |
| Space group                                   | $I4/m$             | $I4/m$              | $I4/m$                                          |
| Calculated crystallite size (Å <sup>3</sup> ) | 278.999            | 273.883             | 273.660                                         |
| R <sub>wp</sub>                               | 3.89%              | 3.58%               | 2.74%                                           |
| R <sub>p</sub>                                | 2.68%              | 2.64%               | 2.06%                                           |
